# Supplementary figures and images for: HIIT Promotes M2 Macrophage Polarization and Sympathetic Nerve Density to Induce Adipose Tissue Browning in T2DM Mice
Source: MDPI journal article supplement (doi:10.3390/biom14030246), 2024-02-20

**Figure S1:**

The original image of Figure 6F:

TH: 60KD

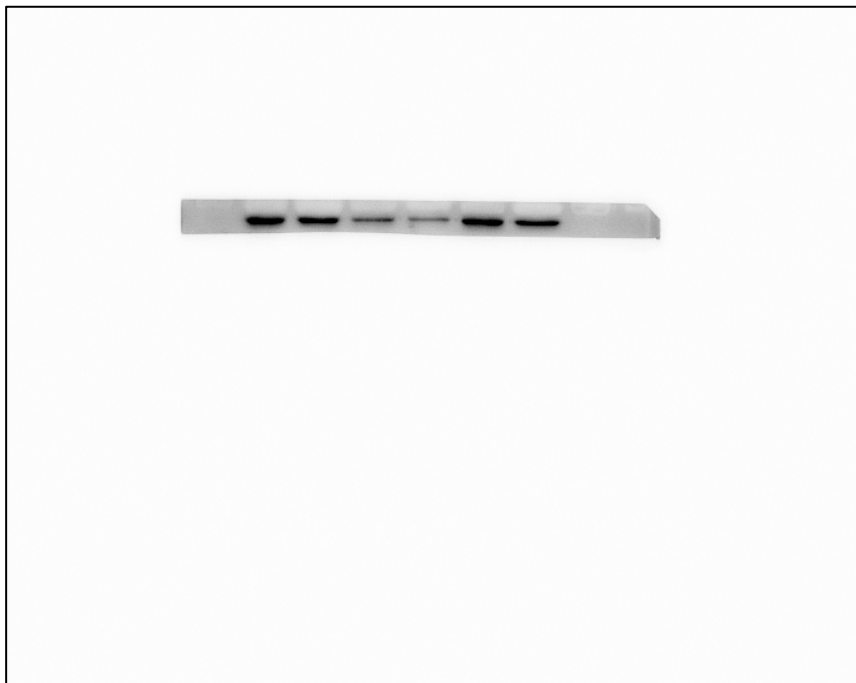

$\beta$ -actin: 42KD

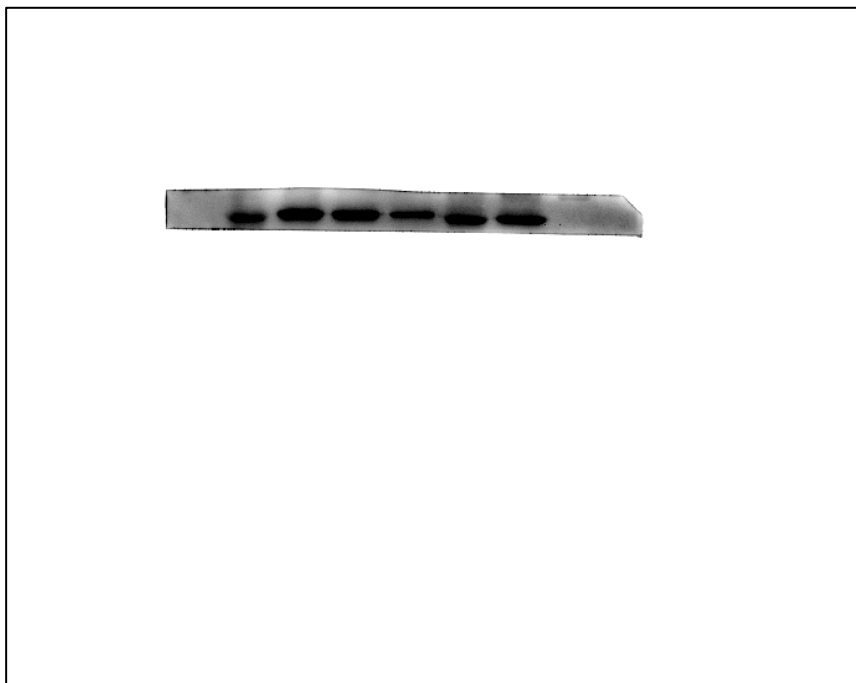

Supplement: s1 [file s1]
